# Supplementary material for: The Influence of Crops on the Content of Polycyclic Aromatic Hydrocarbons in Soil Fertilized with Manure and Mineral Fertilizers
Source: MDPI journal article supplement (doi:10.3390/ijerph192013627), 2022-10-20
Supplement: s1 [file s1]

**Table S1:** Dates of agronomic practices in the cultivation of sugar beets, spring barley, maize, and spring wheat.

| Agronomic practices                                                                   | Sugar beet<br>(1998, 2002, 2006) | Agronomic practices                                                                                                                                                                                       | Spring barley<br>(1999, 2003,2007) | Agronomic practices                                                                   | Maize<br>(2000, 2004, 2008) | Agronomic practices                                                                                                                                         | Spring wheat<br>(2001, 2005, 2009) |
|---------------------------------------------------------------------------------------|----------------------------------|-----------------------------------------------------------------------------------------------------------------------------------------------------------------------------------------------------------|------------------------------------|---------------------------------------------------------------------------------------|-----------------------------|-------------------------------------------------------------------------------------------------------------------------------------------------------------|------------------------------------|
| Ca fertilization<br>(2.5 t ha <sup>-1</sup> )                                         | 03/09-05/09                      | Fall plowing                                                                                                                                                                                              | 23/10-25/10                        | Manure application<br>(40 t ha <sup>-1</sup> - experimental series with manure)       | 25/09-17/10                 | Fall plowing                                                                                                                                                | 14/10-30/10                        |
| Skimming, harrowing                                                                   | 04/09-08/09                      | Harrowing                                                                                                                                                                                                 | 20/03-08/04                        | Fall plowing                                                                          | 26/09-17/10                 | Cultivation unit, harrowing                                                                                                                                 | 27/03-11/04                        |
| Manure application (40 t ha <sup>-1</sup> - experimental series with manure)          | 11/10-22/10                      | NPK fertilization in accordance with experimental design, cultivation unit, harrowing                                                                                                                     | 26/03-15/04                        | Cultivation unit, harrowing                                                           | 30/03-28/04                 | NPK fertilization in accordance with experimental design, cultivation unit, harrowing                                                                       | 06/04-29/04                        |
| Disking                                                                               | 13/10-15/10                      | Harrowing, Sowing, post-sowing harrowing                                                                                                                                                                  | 27/03-16/04                        | NPK fertilization in accordance with experimental design, cultivation unit, harrowing | 26/04-29/04                 | Sowing                                                                                                                                                      | 07/04-29/04                        |
| Fall plowing                                                                          | 24/10-28/10                      | Herbicide application:<br><i>Granstar</i> 18 kg ha <sup>-1</sup> ,<br><i>Chwastox Extra</i> 3.0 l ha <sup>-1</sup>                                                                                        | 14/05-28/05                        | Sowing                                                                                | 27/04-30/04                 | Herbicide application:<br><i>Granstar</i> 20 g ha <sup>-1</sup> +<br><i>Trend</i> 0.05 l ha <sup>-1</sup>                                                   | 14/05-19/05                        |
| Cultivation unit, harrowing                                                           | 01/04-20/04                      | Top-dressing, treatment 4 (N- 34% ammonium nitrate, in accordance with experimental design)                                                                                                               | 23/05-03/06                        | Herbicide application:<br><i>Milagro Extra 60SC</i> 0.6 l ha <sup>-1</sup>            | 29/05-02/06                 | Top-dressing, treatment 4 (34% ammonium nitrate, in accordance with experimental design)                                                                    | 25/05-10/06                        |
| NPK fertilization in accordance with experimental design, cultivation unit, harrowing | 08/04-22/04                      | Fungicide application:<br><i>Escudo Forte</i> 0.8 l ha <sup>-1</sup> ,<br><i>Juwel</i> 0.9 l ha <sup>-1</sup> ,<br>Insecticide application:<br><i>Karate</i> 0.25 l ha <sup>-1</sup> (cereal leaf beetle) | 05/06-17/06                        | Top-dressing, treatment 8 in accordance with experimental design                      | 25/05-01/07                 | Fungicide application:<br><i>Amistar</i> 1.0 l ha <sup>-1</sup> ,<br>Insecticide application:<br><i>Decis</i> 0.25 l ha <sup>-1</sup> (cereal leaf beetle), | 05/06-29/06                        |
| Harrowing, Sowing                                                                     | 10/04-28/04                      | Insecticide application:<br><i>Decis</i> 0.25 l ha <sup>-1</sup> (cereal leaf beetle),<br><i>Fastac</i> 0.1 l ha <sup>-1</sup> (cereal leaf beetle),<br><i>Charisma</i> 1.5 l ha <sup>-1</sup>            | 11/06-21/06                        | Harvest                                                                               | 22/09-04/10                 | Insecticide application:<br><i>Charisma</i> 1.5 l ha <sup>-1</sup> ,<br><i>Nurella</i> 0.6 l ha <sup>-1</sup>                                               | 20/06-01/07                        |
| Herbicide application:<br><i>Pyramin</i> 3 kg ha <sup>-1</sup>                        | 10/04-12/04                      | Harvest with a plot combine harvester                                                                                                                                                                     | 02/08-09/08                        |                                                                                       |                             | Harvest with a plot combine harvester                                                                                                                       | 19/08-29/08                        |
| Inter-row weeding                                                                     | 22/04-23/05                      |                                                                                                                                                                                                           |                                    |                                                                                       |                             |                                                                                                                                                             |                                    |
| Sugar beet thinning                                                                   | 17/05-08/06                      |                                                                                                                                                                                                           |                                    |                                                                                       |                             |                                                                                                                                                             |                                    |
| Top-dressing of sugar beets (treatment 4)                                             | 23/05-09/06                      |                                                                                                                                                                                                           |                                    |                                                                                       |                             |                                                                                                                                                             |                                    |
| Harvest                                                                               | 06/10-13/10                      |                                                                                                                                                                                                           |                                    |                                                                                       |                             |                                                                                                                                                             |                                    |

**Table S2:** Phenological growth stages of sugar beets, spring barley, maize, and spring wheat.

| Growth stage | Sugar beets<br>(1998, 2002, 2006) | Growth stage | Spring barley<br>(1999, 2003, 2007) | Growth stage | Maize<br>(2000, 2004, 2008) | Growth stage | Spring wheat<br>(2001, 2005, 2009) |
|--------------|-----------------------------------|--------------|-------------------------------------|--------------|-----------------------------|--------------|------------------------------------|
| BBCH 10      | 02/05-12/05                       | BBCH 10      | 13/04-28/04                         | BBCH 10      | 05/05-12/05                 | BBCH 10      | 17/04-30/04                        |
| BBCH 19      | 06/05-16/05                       | BBCH 19      | 17/04-02/05                         | BBCH 19      | 09/05-15/05                 | BBCH 19      | 20/04-05/05                        |
| BBCH 31      | 29/05-26/06                       | BBCH 21      | 28/04-09/05                         | BBCH 30      | 12/06-24/07                 | BBCH 21      | 05/05-13/05                        |
| BBCH 39      | 10/06-02/07                       | BBCH 29      | 01/05-14/05                         | BBCH 39      | 17/06-29/07                 | BBCH 29      | 09/05-17/05                        |
|              |                                   | BBCH 30      | 11/05-23/05                         | BBCH 51      | 01/06-05/08                 | BBCH 30      | 19/05-25/05                        |
|              |                                   | BBCH 39      | 16/05-29/05                         | BBCH 59      | 17/06-10/08                 | BBCH 39      | 22/05-30/05                        |
|              |                                   | BBCH 51      | 02/06-13/06                         | BBCH 61      | 04/07-17/08                 | BBCH 51      | 15/06-29/06                        |
|              |                                   | BBCH 59      | 06/06-16/06                         | BBCH 67      | 26/06-18/08                 | BBCH 58      | 22/06-07/07                        |
|              |                                   | BBCH 61      | 07/06-23/06                         | BBCH 73      | 08/07-21/08                 | BBCH 61      | 19/06-18/07                        |
|              |                                   | BBCH 73      | 24/06-10/07                         | BBCH 75      | 14/08-28/08                 | BBCH 65      | 30/06-22/07                        |
|              |                                   | BBCH 75      | 28/06-15/07                         | BBCH 83      | 12/07-03/09                 | BBCH 73      | 25/06-26/07                        |
|              |                                   | BBCH 83      | 11/07-27/07                         | BBCH 85      | 27/08-08/09                 | BBCH 75      | 29/06-29/07                        |
|              |                                   | BBCH 85      | 14/07-30/07                         | BBCH 89      | 12/09-18/09                 | BBCH 83      | 22/07-02/08                        |
|              |                                   | BBCH 87      | 19/07-04/08                         |              |                             | BBCH 85      | 26/07-06/08                        |
|              |                                   | BBCH 89      | 23/07-07/08                         |              |                             | BBCH 87      | 29/07-10/08                        |
|              |                                   |              |                                     |              |                             | BBCH 89      | 02/08-14/08                        |
|              |                                   |              |                                     |              |                             |              |                                    |
|              |                                   |              |                                     |              |                             |              |                                    |

\*BBCH - Biologische Bundesanstalt, Bundessortenamt und CHemische Industrie coding.

**Table S3:** Content of PAHs in soil during the long-term field experiment (1998-2009) across years (Y), and the interactions between years (Y) and organic fertilization (O).

| Total content of 16 PAHs in soil     |                        |                        |                       |                        |                        |                        |                        |                        |                        |                        |                        |                        |
|--------------------------------------|------------------------|------------------------|-----------------------|------------------------|------------------------|------------------------|------------------------|------------------------|------------------------|------------------------|------------------------|------------------------|
| Crop species                         | Sugar beets            |                        |                       | Spring barley          |                        |                        | Maize                  |                        |                        | Spring wheat           |                        |                        |
| year                                 | 1998                   | 2002                   | 2006                  | 1999                   | 2003                   | 2007                   | 2000                   | 2004                   | 2008                   | 2001                   | 2005                   | 2009                   |
| manure - µg kg <sup>-1</sup>         | 227.9                  | 278.3                  | 126.9                 | 377.6                  | 145.9                  | 199.0                  | 286.3                  | 222.5                  | 295.0                  | 268.5                  | 162.5                  | 220.2                  |
| (log transformed data)               | (2.340 <sup>d</sup> )  | (2.441 <sup>b</sup> )  | (2.032 <sup>i</sup> ) | (2.564 <sup>a</sup> )  | (2.135 <sup>i</sup> )  | (2.201 <sup>h</sup> )  | (2.446 <sup>b</sup> )  | (2.327 <sup>de</sup> ) | (2.446 <sup>b</sup> )  | (2.412 <sup>c</sup> )  | (2.189 <sup>h</sup> )  | (2.301 <sup>ef</sup> ) |
| without manure - µg kg <sup>-1</sup> | 205.0                  | 167.6                  | 77.9                  | 215.6                  | 168.1                  | 185.2                  | 277.1                  | 172.2                  | 269.6                  | 193.7                  | 118.8                  | 210.6                  |
| (log transformed data)               | (2.299 <sup>ef</sup> ) | (2.215 <sup>h</sup> )  | (1.871 <sup>k</sup> ) | (2.318 <sup>e</sup> )  | (2.189 <sup>h</sup> )  | (2.196 <sup>h</sup> )  | (2.413 <sup>bc</sup> ) | (2.203 <sup>h</sup> )  | (2.416 <sup>bc</sup> ) | (2.263 <sup>g</sup> )  | (2.052 <sup>i</sup> )  | (2.294 <sup>i</sup> )  |
| mean - µg kg <sup>-1</sup>           | 216.5                  | 223.0                  | 102.4                 | 296.6                  | 157.0                  | 192.1                  | 281.7                  | 197.3                  | 282.3                  | 231.1                  | 140.7                  | 215.4                  |
| (log transformed data)               | (2.319 <sup>b</sup> )  | (2.328 <sup>b</sup> )  | (1.951 <sup>h</sup> ) | (2.441 <sup>a</sup> )  | (2.162 <sup>f</sup> )  | (2.199 <sup>e</sup> )  | (2.429 <sup>a</sup> )  | (2.265 <sup>d</sup> )  | (2.431 <sup>a</sup> )  | (2.337 <sup>b</sup> )  | (2.121 <sup>g</sup> )  | (2.297 <sup>c</sup> )  |
| Total content of light PAHs in soil  |                        |                        |                       |                        |                        |                        |                        |                        |                        |                        |                        |                        |
| manure - µg kg <sup>-1</sup>         | 98.0                   | 182.2                  | 42.0                  | 233.4                  | 75.5                   | 99.3                   | 166.3                  | 120.5                  | 71.4                   | 132.4                  | 95.5                   | 53.2                   |
| (log transformed data)               | (1.972 <sup>ie</sup> ) | (2.249 <sup>b</sup> )  | (1.565 <sup>l</sup> ) | (2.345 <sup>a</sup> )  | (1.746 <sup>ij</sup> ) | (1.891 <sup>h</sup> )  | (2.191 <sup>c</sup> )  | (2.026 <sup>ef</sup> ) | (1.786 <sup>i</sup> )  | (2.102 <sup>d</sup> )  | (1.925 <sup>gh</sup> ) | (1.586 <sup>l</sup> )  |
| without manure - µg kg <sup>-1</sup> | 94.4                   | 100.3                  | 17.0                  | 98.6                   | 65.2                   | 68.4                   | 125.3                  | 109.6                  | 50.9                   | 101.4                  | 59.2                   | 25.5                   |
| (log transformed data)               | (1.959 <sup>g</sup> )  | (1.993 <sup>f</sup> )  | (1.196 <sup>n</sup> ) | (1.945 <sup>gh</sup> ) | (1.732 <sup>i</sup> )  | (1.727 <sup>i</sup> )  | (2.044 <sup>e</sup> )  | (1.957 <sup>g</sup> )  | (1.631 <sup>k</sup> )  | (1.981 <sup>fg</sup> ) | (1.594 <sup>kl</sup> ) | (1.387 <sup>m</sup> )  |
| mean - µg kg <sup>-1</sup>           | 96.2                   | 141.2                  | 29.5                  | 166.0                  | 70.3                   | 83.9                   | 145.8                  | 115.0                  | 61.1                   | 116.9                  | 77.4                   | 39.3                   |
| (log transformed data)               | (1.965 <sup>d</sup> )  | (2.121 <sup>ab</sup> ) | (1.380 <sup>i</sup> ) | (2.145 <sup>a</sup> )  | (1.739 <sup>f</sup> )  | (1.809 <sup>e</sup> )  | (2.117 <sup>b</sup> )  | (1.991 <sup>d</sup> )  | (1.709 <sup>g</sup> )  | (2.042 <sup>c</sup> )  | (1.760 <sup>f</sup> )  | (1.487 <sup>h</sup> )  |
| Total content of heavy PAHs in soil  |                        |                        |                       |                        |                        |                        |                        |                        |                        |                        |                        |                        |
| manure - µg kg <sup>-1</sup>         | 129.9                  | 96.1                   | 84.9                  | 144.2                  | 70.4                   | 99.7                   | 120.0                  | 102.2                  | 223.6                  | 136.1                  | 67.0                   | 167.0                  |
| (log transformed data)               | (2.082 <sup>d</sup> )  | (1.978 <sup>f</sup> )  | (1.805 <sup>i</sup> ) | (2.129 <sup>cd</sup> ) | (1.756 <sup>i</sup> )  | (1.874 <sup>h</sup> )  | (2.065 <sup>d</sup> )  | (1.992 <sup>ef</sup> ) | (2.329 <sup>a</sup> )  | (2.096 <sup>cd</sup> ) | (1.724 <sup>jk</sup> ) | (2.148 <sup>c</sup> )  |
| without manure - µg kg <sup>-1</sup> | 111.0                  | 67.3                   | 60.9                  | 116.9                  | 102.9                  | 116.8                  | 151.9                  | 62.6                   | 218.7                  | 92.2                   | 59.5                   | 185.1                  |
| (log transformed data)               | (2.026 <sup>e</sup> )  | (1.805 <sup>i</sup> )  | (1.761 <sup>j</sup> ) | (2.057 <sup>de</sup> ) | (1.986 <sup>f</sup> )  | (1.992 <sup>ef</sup> ) | (2.154 <sup>c</sup> )  | (1.757 <sup>i</sup> )  | (2.318 <sup>a</sup> )  | (1.934 <sup>g</sup> )  | (1.687 <sup>k</sup> )  | (2.236 <sup>b</sup> )  |
| mean - µg kg <sup>-1</sup>           | 120.4                  | 81.7                   | 72.9                  | 130.5                  | 86.7                   | 108.2                  | 135.9                  | 82.3                   | 221.2                  | 114.2                  | 63.3                   | 176.0                  |
| (log transformed data)               | (2.054 <sup>d</sup> )  | (1.891 <sup>g</sup> )  | (1.783 <sup>h</sup> ) | (2.093 <sup>c</sup> )  | (1.871 <sup>g</sup> )  | (1.933 <sup>f</sup> )  | (2.109 <sup>c</sup> )  | (1.875 <sup>g</sup> )  | (2.323 <sup>a</sup> )  | (2.015 <sup>e</sup> )  | (1.705 <sup>i</sup> )  | (2.192 <sup>b</sup> )  |

\* log transformed data followed by different letters a,b,c (...) are significantly different at  $p < 0.05$
